## CORRECTION

# Correction: High-dose drug heat map analysis for drug safety and efficacy in multi-spheroid brain normal cells and GBM patient-derived cells

Sang-Yun Lee, Yvonne Teng, Miseol Son, Bosung Ku, Ho Sang Moon, Vinay Tergaonkar, Pierce Kah-Hoe Chow, Dong Woo Lee, Do-Hyun Nam

An additional affiliation is missing for the eighth author. Dong Woo Lee is also affiliated with Central R & D Center, Medical & Bio Device (MBD) Co., Ltd, Suwon, 16229, Republic of Korea.

## Reference

1. Lee SY, Teng Y, Son M, Ku B, Moon HS, Tergaonkar V, et al. (2021) High-dose drug heat map analysis for drug safety and efficacy in multi-spheroid brain normal cells and GBM patient-derived cells. PLoS ONE 16(12): e0251998. <https://doi.org/10.1371/journal.pone.0251998> PMID: 34855773

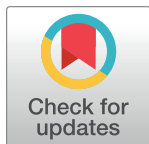

## OPEN ACCESS

**Citation:** Lee S-Y, Teng Y, Son M, Ku B, Moon HS, Tergaonkar V, et al. (2023) Correction: High-dose drug heat map analysis for drug safety and efficacy in multi-spheroid brain normal cells and GBM patient-derived cells. PLoS ONE 18(12): e0295827. <https://doi.org/10.1371/journal.pone.0295827>

**Published:** December 7, 2023

**Copyright:** © 2023 Lee et al. This is an open access article distributed under the terms of the [Creative Commons Attribution License](https://creativecommons.org/licenses/by/4.0/), which permits unrestricted use, distribution, and reproduction in any medium, provided the original author and source are credited.
